# Supplementary material
Source: PubMed Central journal article supplement (PMC2875380)
Supplement: NIHMS154286-supplement-Suppl_Data.pdf [file NIHMS154286-supplement-Suppl_Data.pdf]

Web-based Supplementary Materials for  
Semiparametric Models of Time-dependent Predictive Values  
of Prognostic Biomarkers

Y. Zheng, T. Cai, J. L. Stanford and Z. Feng

## Appendix

Throughout we assume that the joint density of  $T$ ,  $C$  and  $Y$  is twice continuously differentiable and  $\mathbf{W} = (Y, \mathbf{Z}^\top)^\top$  belongs to a compact set  $\Omega_{\mathbf{W}}$ . We consider  $v \in [p_l, p_u] \subset (0, 1)$  and  $t \in [\tau_1, \tau_2]$ , where  $\tau_1$  and  $\tau_2$  are pre-determined constants such that  $P(X < \tau_1) > 0$  and  $P(X > \tau_2) > 0$ . In addition, we assume that  $F'_{Y|\mathbf{z}}(y) = \partial F_{Y|\mathbf{z}}(y)/\partial y$ , is bounded away from 0 for  $y \in [c_{\mathbf{z}}(p_l), c_{\mathbf{z}}(p_u)]$ . For  $\widehat{F}_{Y|\mathbf{z}}(y)$ , without loss of generality, we assume that

$$\sup_y \left| n^{1/2} \left\{ \widehat{F}_{Y|\mathbf{z}}(y) - F_{Y|\mathbf{z}}(y) \right\} - n^{-\frac{1}{2}} \sum_{i=1}^n \mathcal{P}_i(y, \mathbf{z}) \right| = o_p(1), \quad (\text{A}\cdot 1)$$

where  $\mathcal{P}_i(y, \mathbf{z}) = \mathcal{P}(y, \mathbf{z}, X_i, \Delta_i, Y_i, \mathbf{Z}_i)$  for some function  $\mathcal{P}$  that is bounded for  $(y, \mathbf{z}) \in \Omega_{\mathbf{W}}$  with total variation bounded by a constant. The regularity condition on  $\mathcal{P}$  ensures the manageability (Pollard, 1990) of  $\{\mathcal{P}_i(y, \mathbf{z}), i = 1, \dots, n\}$  which leads to the weak convergence of  $n^{1/2}\{\widehat{F}_{Y|\mathbf{z}}(y) - F_{Y|\mathbf{z}}(y)\}$  to a zero-mean Gaussian process. Under a semi-parametric location model,

$$\mathcal{P}_i(y, \mathbf{z}) = I(Y_i - \gamma_0^\top \mathbf{Z}_i \leq y - \gamma_0^\top \mathbf{z}) - F_{Y|\mathbf{z}}(y) + F'_{Y|\mathbf{z}}(y) \{E(\mathbf{Z}) - \mathbf{z}\}^\top E(\mathbf{Z}^{\otimes 2})^{-1} \mathbf{Z}_i (Y_i - \gamma_0^\top \mathbf{Z}_i)$$

which satisfies (A.1).

### A. Inference on covariate effects<sup>1</sup>

Consider a general location-scale model for the marker  $Y$ :

$$Y_i = \gamma_0^\top \mathbf{Z}_i + \exp(\boldsymbol{\kappa}_0^\top \mathbf{Z}_i) \epsilon_i. \quad (\text{A}\cdot 2)$$

#### Claim:

A. Under the model

$$\lambda_{Y_i, \mathbf{Z}_i}(t) = \lambda_0(t) \exp(\alpha_0 Y_i + \boldsymbol{\beta}_0^\top \mathbf{Z}_i), \quad (\text{A}\cdot 3)$$

---

<sup>1</sup>The authors cordially thank Dr. David Zucker for kindly providing help with the proof in this section.

$\text{PPV}_{\mathbf{z}_1}(t, v) = \text{PPV}_{\mathbf{z}_2}(t, v)$  for all  $t, v, \mathbf{z}_1$ , and  $\mathbf{z}_2$  if and only if  $\alpha_0 \boldsymbol{\kappa}_0 = \mathbf{0}$  and  $\boldsymbol{\beta}_0 = -\alpha_0 \boldsymbol{\gamma}_0$ .

B. Assume the model

$$\lambda_{Y_i, \mathbf{z}_i}(t) = \lambda_0(t, Y_i) \exp(\boldsymbol{\beta}_0^\top \mathbf{z}_i). \quad (\text{A.4})$$

Write

$$\begin{aligned} \Lambda_0(t, y) &= \int_0^t \lambda_0(u, y) du, \\ \zeta(t, y) &= \frac{\partial}{\partial y} \log \Lambda_0(t, y). \end{aligned}$$

Suppose the following condition:

**Non-PH Condition:** There exist values  $y^*$ ,  $t_1^*$ , and  $t_2^*$  such that  $\zeta(t_1^*, y^*) \neq 0$ ,  $\zeta(t_2^*, y^*) \neq 0$ , and  $\zeta(t_1^*, y^*) \neq \zeta(t_2^*, y^*)$ , i.e.,  $\Lambda_0(t, y)$  does not have the general proportional hazards form  $\Lambda_0(t, y) = \Lambda_0(t) \Omega(y)$ .

Then  $\text{PPV}_{\mathbf{z}_1}(t, v) = \text{PPV}_{\mathbf{z}_2}(t, v)$  for all  $t, v, \mathbf{z}_1$ , and  $\mathbf{z}_2$  if and only if  $\boldsymbol{\beta}_0 = \boldsymbol{\gamma}_0 = \boldsymbol{\kappa}_0 = \mathbf{0}$ .

**Proof:**

We note that  $\text{PPV}_{\mathbf{z}_1}(t, v) = \text{PPV}_{\mathbf{z}_2}(t, v)$  for all  $t, v, \mathbf{z}_1$ , and  $\mathbf{z}_2$  if and only if

$$\int_{c_{\mathbf{z}_1}(v)}^{\infty} S_{y, \mathbf{z}_1}(t) dF_{Y|\mathbf{z}_1}(y) = \int_{c_{\mathbf{z}_2}(v)}^{\infty} S_{y, \mathbf{z}_2}(t) dF_{Y|\mathbf{z}_2}(y).$$

Taking the derivative with respect to  $v$  on both sides and noting that  $\partial c_{\mathbf{z}}(v)/\partial v = [f_{Y|\mathbf{z}}(c_{\mathbf{z}}(v))]^{-1}$ ,

we find that the above equality is equivalent to the equality

$$S_{c_{\mathbf{z}_1}(v), \mathbf{z}_1}(t) = S_{c_{\mathbf{z}_2}(v), \mathbf{z}_2}(t) \quad (\text{A.5})$$

for all  $t, v, \mathbf{z}_1$ , and  $\mathbf{z}_2$ .

We first consider Claim A. Under Model (A.3), the equality (A.5) is equivalent to the equality

$$\alpha_0 c_{\mathbf{z}_1}(v) + \boldsymbol{\beta}_0^\top \mathbf{z}_1 = \alpha_0 c_{\mathbf{z}_2}(v) + \boldsymbol{\beta}_0^\top \mathbf{z}_2. \quad (\text{A.6})$$

Under Model (A.2), we have

$$c_{\mathbf{z}}(v) = \boldsymbol{\gamma}_0^\top \mathbf{z} + \exp(\boldsymbol{\kappa}_0^\top \mathbf{z}) G^{-1}(v), \quad (\text{A.7})$$

where  $G$  is the distribution function of  $\epsilon_i$ . It is obvious that the condition  $\alpha_0 \boldsymbol{\kappa}_0 = \mathbf{0}$  and  $\boldsymbol{\beta}_0 = -\alpha_0 \boldsymbol{\gamma}_0$  implies (A.7).

We now prove the converse. The condition (A.6) implies that the quantity

$$\alpha_0 \{ \boldsymbol{\gamma}_0^\top \mathbf{z} + \exp(\boldsymbol{\kappa}_0^\top \mathbf{z}) G^{-1}(v) \} + \boldsymbol{\beta}_0^\top \mathbf{z}$$

is constant over  $\mathbf{z}$ , for all  $t$  and  $v$ . Taking the derivative with respect to  $\mathbf{z}$  yields the equality

$$(\alpha_0 \boldsymbol{\gamma}_0 + \boldsymbol{\beta}_0) + \alpha_0 \boldsymbol{\kappa}_0 \exp(\boldsymbol{\kappa}_0^\top \mathbf{z}) G^{-1}(v) = \mathbf{0} \quad \forall v.$$

The above equality implies that, for any given  $\mathbf{z}$ , there multiple values of  $v$  such that  $\alpha_0 \boldsymbol{\kappa}_0 \exp(\boldsymbol{\kappa}_0^\top \mathbf{z}) G^{-1}(v) = -(\alpha_0 \boldsymbol{\gamma}_0 + \boldsymbol{\beta}_0)$ . This, in turn, implies  $\alpha_0 \boldsymbol{\kappa}_0 = \mathbf{0}$  and  $\boldsymbol{\beta}_0 = -\alpha_0 \boldsymbol{\gamma}_0$ .

Now we consider Claim B. Under Model (A.4), the equality (A.5) is equivalent to

$$\log \Lambda_0 \{ t, c_{\mathbf{z}_1}(v) \} + \boldsymbol{\beta}_0^\top \mathbf{z}_1 = \log \Lambda_0 \{ t, c_{\mathbf{z}_2}(v) \} + \boldsymbol{\beta}_0^\top \mathbf{z}_2 \quad \forall t, v, \mathbf{z}_1, \mathbf{z}_2, \quad (\text{A.8})$$

which implies that the function

$$\log \Lambda_0 \{ t, c_{\mathbf{z}}(v) \} + \boldsymbol{\beta}_0^\top \mathbf{z} \quad (\text{A.9})$$

is constant in  $\mathbf{z}$  for all  $t$  and  $v$ . Under Model (A.2), this obviously holds if  $\boldsymbol{\beta}_0 = \boldsymbol{\gamma}_0 = \boldsymbol{\kappa}_0 = \mathbf{0}$ .

We now show the converse. Taking the derivative of (A.9) with respect to  $\mathbf{z}$  yields

$$\zeta \{ t, c_{\mathbf{z}}(v) \} \nabla_{\mathbf{z}} c_{\mathbf{z}}(v) + \boldsymbol{\beta}_0 = \mathbf{0} \quad \forall t, v, \mathbf{z},$$

where  $\nabla_{\mathbf{z}} c_{\mathbf{z}}(v)$  denotes the gradient of  $c_{\mathbf{z}}(v)$ . From (A.7) we have

$$\nabla_{\mathbf{z}} c_{\mathbf{z}}(v) = \boldsymbol{\gamma}_0 + \boldsymbol{\kappa}_0 \exp(\boldsymbol{\kappa}_0^\top \mathbf{z}) G^{-1}(v),$$

so we get

$$\zeta \{ t, c_{\mathbf{z}}(v) \} \{ \boldsymbol{\gamma}_0 + \boldsymbol{\kappa}_0 \exp(\boldsymbol{\kappa}_0^\top \mathbf{z}) G^{-1}(v) \} + \boldsymbol{\beta}_0 = \mathbf{0} \quad \forall t, v, \mathbf{z}.$$

Now for all  $(\mathbf{z}, v)$  in the set  $A = \{ (\mathbf{z}, v) : \boldsymbol{\gamma}_0^\top \mathbf{z} + \exp(\boldsymbol{\kappa}_0^\top \mathbf{z}) G^{-1}(v) = y^* \}$ , we get

$$\zeta(t, y^*) \{ \boldsymbol{\gamma}_0 + \boldsymbol{\kappa}_0 (y^* - \boldsymbol{\gamma}_0^\top \mathbf{z}) \} = -\boldsymbol{\beta}_0 \quad \forall t, \text{ and all } \mathbf{z} \in A_p, \quad (\text{A.10})$$

where  $A_p$  is the projection of  $A$  onto the first  $p$  dimensions. We now argue componentwise.

Suppose that  $\beta_{0j} = 0$ . We then have  $\gamma_{0j} + \kappa_{0j} a = 0$  for at least two distinct values of  $a$ , which

implies that  $\gamma_{0j} = \kappa_{0j} = 0$ . Next, suppose that  $\beta_{0j} \neq 0$  and  $\gamma_{0j} = 0$ . Then (A.10) gives

$$\kappa_{0j}(y^* - \boldsymbol{\gamma}_0^\top \mathbf{z}) = -\beta_{0j}/\zeta(t, y^*) \quad \forall t, \text{ and all } \mathbf{z} \in A_p.$$

In view of the Non-PH condition, this produces a contradiction. Finally, suppose that  $\beta_{0j} \neq 0$  and  $\gamma_{0j} \neq 0$ . Differentiating (A.10) with respect to  $z_j$  leads to  $\boldsymbol{\kappa}_0 = \mathbf{0}$ . This produces  $\gamma_{0j} = -\beta_{0j}/\zeta(t, y^*)$  for all  $t$ . Again, in view of the Non-PH condition, this produces a contradiction. We thus conclude that  $\beta_{0j} = 0$ , and hence  $\gamma_{0j} = \kappa_{0j} = 0$ .

## B. Asymptotic Properties of $\widetilde{\text{PPV}}_{\mathbf{z}}(t, v)$

We let  $\tilde{\boldsymbol{\theta}} = (\tilde{\alpha}, \tilde{\boldsymbol{\beta}}^\top)^\top$ ,  $\boldsymbol{\theta}_0 = (\alpha_0, \boldsymbol{\beta}_0^\top)^\top$ , and assume that  $\boldsymbol{\theta}_0$  is an interior point of a compact parameter space. We also assume the same regularity conditions as in Andersen & Gill (1982). Under such regularity conditions, it was shown in Andersen & Gill (1982) that  $n^{\frac{1}{2}}(\tilde{\boldsymbol{\theta}} - \boldsymbol{\theta}_0)$  is a normal random variate, and  $n^{\frac{1}{2}}\{\tilde{\Lambda}_0(t) - \Lambda_0(t)\}$  converges to a Gaussian process. Furthermore, by a functional delta theorem that

$$\sup_{t, y} \left| n^{\frac{1}{2}}\{\tilde{S}_{y, \mathbf{z}}(t) - S_{y, \mathbf{z}}(t)\} - n^{-\frac{1}{2}} \sum_{i=1}^n \zeta_{i1}(t, y, \mathbf{z}) \right| = o_p(1), \quad (\text{A.11})$$

which converges weakly to a zero-mean Gaussian process, where

$$\begin{aligned} \zeta_{i1}(t, y, \mathbf{z}) &= S_{y, \mathbf{z}}(t) \exp(\alpha_0 y + \boldsymbol{\beta}_0^\top \mathbf{z}) \left[ \int_0^t \frac{dM_i(u)}{s_0(u, \boldsymbol{\theta}_0)} \right. \\ &\quad \left. + \left\{ \Lambda_0(t) \begin{pmatrix} y \\ z \end{pmatrix} + \mathcal{H}(t, \boldsymbol{\theta}_0) \right\}^\top \mathcal{I}^{-1}(\boldsymbol{\theta}_0) \int_0^\infty \left\{ \mathbf{W}_i - \frac{\mathbb{R}_1(u)}{\mathbb{R}_0(u)} \right\} dM_i(u) \right], \\ \mathcal{H}(\boldsymbol{\theta}_0, t) &= - \int_0^t \frac{\mathbb{R}_1(u) dE\{N_i(u)\}}{\mathbb{R}_0(u)^2}, \quad \mathcal{I}(\boldsymbol{\theta}_0) = \int_0^\infty \frac{\{\mathbb{R}_2(u)\mathbb{R}_0(u) - \mathbb{R}_1(u)^2\} dE\{N_i(s)\}}{\mathbb{R}_0(u)^2}, \end{aligned}$$

$M_i(t) = N_i(t) - \int_0^t I(X_i \geq u) \exp(\boldsymbol{\theta}_0^\top \mathbf{W}_i) d\Lambda_0(u)$  and  $\mathbb{R}_b(t) = E\{I(X_i \geq t) \mathbf{W}_i^{\otimes b} \exp(\boldsymbol{\theta}_0^\top \mathbf{W}_i)\}$ , where for any vector  $\mathbf{a}$ ,  $\mathbf{a}^{\otimes 0} = 1$ ,  $\mathbf{a}^{\otimes 1} = \mathbf{a}$  and  $\mathbf{a}^{\otimes 2} = \mathbf{a}\mathbf{a}^\top$ .

To establish the uniform consistency of  $\widetilde{\text{PPV}}_{\mathbf{z}}(t, v)$ , it suffices to show that (i)  $\sup_v |\hat{c}_{\mathbf{z}}(v) - c_{\mathbf{z}}(v)| = o_p(n^{-1/4})$ ; and (ii)  $\sup_{c, t} \left| \int_c^\infty \{\tilde{S}_{y, \mathbf{z}}(t) d\hat{F}_{Y|\mathbf{z}}(y) - S_{y, \mathbf{z}}(t) dF_{Y|\mathbf{z}}(y)\} \right| = o_p(n^{-1/4})$ , where  $c_{\mathbf{z}}(v) = F_{Y|\mathbf{z}}^{-1}(v)$ . From (A.1), we have  $\sup_v |\hat{F}_{Y|\mathbf{z}}(y) - F_{Y|\mathbf{z}}(y)| = O_p(n^{-1/2})$ . This, together

with the fact that  $F'_{Y|\mathbf{z}}(y)$  is bounded away from 0, we have  $\sup_v |\widehat{c}_{\mathbf{z}}(v) - c_{\mathbf{z}}(v)| = o_p(n^{-1/4})$ .

(ii) follows directly from  $\sup_{t,y} |\widetilde{S}_{y,\mathbf{z}}(t) - S_{y,\mathbf{z}}(t)| = O_p(n^{-1/2})$  and Lemma 1 of Biliias, Gu & Ying (1997). This concludes the uniform consistency of  $\widetilde{\text{PPV}}_{\mathbf{z}}(t, v)$ .

To derive the large sample distribution for  $\widetilde{\text{PPV}}_{\mathbf{z}}(t, v)$ , we write

$$\widetilde{\mathcal{W}}_{\mathbf{z}}(t, v) = n^{\frac{1}{2}} \{ \widetilde{\text{PPV}}_{\mathbf{z}}(t, v) - \text{PPV}_{\mathbf{z}}(t, v) \} = \{ \widetilde{\mathcal{W}}_{\mathbf{z}1}(t, v) + \widetilde{\mathcal{W}}_{\mathbf{z}2}(t, v) \} / (1 - v),$$

where

$$\begin{aligned} \widetilde{\mathcal{W}}_{\mathbf{z}1}(t, v) &= n^{\frac{1}{2}} \int_{\widehat{c}_{v,\mathbf{z}}}^{\infty} \{ \widetilde{S}_{y,\mathbf{z}}(t) - S_{y,\mathbf{z}}(t) \} d\widehat{F}_{Y|\mathbf{z}}(y), \\ \widetilde{\mathcal{W}}_{\mathbf{z}2}(t, v) &= n^{\frac{1}{2}} \left\{ \int_{\widehat{c}_{\mathbf{z}}(v)}^{\infty} S_{y,\mathbf{z}}(t) d\widehat{F}_{Y|\mathbf{z}}(y) - \int_{c_{\mathbf{z}}(v)}^{\infty} S_{y,\mathbf{z}}(t) dF_{Y|\mathbf{z}}(y) \right\}. \end{aligned}$$

To approximate the distribution of  $\widetilde{\mathcal{W}}_{\mathbf{z}1}(t, v)$ , we note that since

$$\sup_y \left| \widehat{F}_{Y|\mathbf{z}}(y) - F_{Y|\mathbf{z}}(y) \right| + \sup_{t,y} \left| \widetilde{S}_{y,\mathbf{z}}(t) - S_{y,\mathbf{z}}(t) \right| + \sup_v |\widehat{c}_{\mathbf{z}}(v) - c_{\mathbf{z}}(v)| = o_p(n^{-\frac{1}{4}}).$$

we have

$$\widetilde{\mathcal{W}}_{\mathbf{z}1}(t, v) = n^{\frac{1}{2}} \int_{c_{\mathbf{z}}(v)}^{\infty} \{ \widetilde{S}_{y,\mathbf{z}}(t) - S_{y,\mathbf{z}}(t) \} dF_{Y|\mathbf{z}}(y).$$

It then follows from (A.11) that

$$\widetilde{\mathcal{W}}_{\mathbf{z}1}(t, v) \simeq n^{\frac{1}{2}} \int_{c_{\mathbf{z}}(v)}^{\infty} \zeta_{i1}(t, y, \mathbf{z}) dF_{Y|\mathbf{z}}(y). \quad (\text{A.12})$$

Now, for  $\widetilde{\mathcal{W}}_{\mathbf{z}2}(t, v)$ , we note that

$$\begin{aligned} & n^{\frac{1}{2}} \int_{\widehat{c}_{\mathbf{z}}(v)}^{\infty} S_{y,\mathbf{z}}(t) d\widehat{F}_{Y|\mathbf{z}}(y) - \int_{c_{\mathbf{z}}(v)}^{\infty} S_{y,\mathbf{z}}(t) dF_{Y|\mathbf{z}}(y) \\ & \simeq n^{\frac{1}{2}} \int_{c_{\mathbf{z}}(v)}^{\infty} S_{y,\mathbf{z}}(t) d \left\{ \widehat{F}_{Y|\mathbf{z}}(y) - F_{Y|\mathbf{z}}(y) \right\} + n^{\frac{1}{2}} \left\{ \int_{\widehat{c}_{\mathbf{z}}(v)}^{\infty} S_{y,\mathbf{z}}(t) dF_{Y|\mathbf{z}}(y) - \int_{c_{\mathbf{z}}(v)}^{\infty} S_{y,\mathbf{z}}(t) dF_{Y|\mathbf{z}}(y) \right\} \\ & = n^{\frac{1}{2}} \int_{c_{\mathbf{z}}(v)}^{\infty} S_{y,\mathbf{z}}(t) d \left\{ \widehat{F}_{Y|\mathbf{z}}(y) - F_{Y|\mathbf{z}}(y) \right\} - n^{\frac{1}{2}} \left\{ \widehat{F}_{Y|\mathbf{z}}(c_{\mathbf{z}}(v)) - v \right\} S_{c_{\mathbf{z}}(v),\mathbf{z}}(t) \end{aligned}$$

It then follows from (A.1) that

$$\widetilde{\mathcal{W}}_{\mathbf{z}2}(t, v) \simeq n^{-1/2} \sum_{i=1}^n \zeta_{i2}(t, v, \mathbf{z}), \quad (\text{A.13})$$

where

$$\zeta_{i2}(t, v, \mathbf{z}) = \int_{c_{\mathbf{z}(v)}}^{\infty} S_{y, \mathbf{z}}(t) d\mathcal{P}_i(y, \mathbf{z}) - S_{c_{\mathbf{z}(v)}, \mathbf{z}}(t) \mathcal{P}_i(c_{\mathbf{z}(v)}, \mathbf{z})$$

In a special case when  $F_{Y|\mathbf{z}}(\cdot)$  is estimated empirically,

$$\zeta_{i2}(t, v, \mathbf{z}) = \frac{I(\mathbf{Z}_i = \mathbf{z})}{a_z} \left[ \{S_{Y_i, \mathbf{z}}(t) - S_{c_{\mathbf{z}(v)}}(t)\} I\{Y_i > c_{\mathbf{z}(v)}\} + \int_{c_{\mathbf{z}(v)}}^{\infty} \{S_{c_{\mathbf{z}(v)}}(t) - S_{y, \mathbf{z}}(t)\} dF_{Y|\mathbf{z}}(y) \right],$$

where  $a_z = P(Z_i = z)$ . Combining (A.12) and (A.13), we have  $\widetilde{W}_{\mathbf{z}}(t, v) \simeq n^{-\frac{1}{2}} \sum_{i=1}^n \zeta_i(t, v, \mathbf{z})$ ,

where

$$\zeta_i(t, v, \mathbf{z}) = (1 - v)^{-1} \left\{ \int_{c_{\mathbf{z}(v)}}^{\infty} \zeta_{i1}(t, y, \mathbf{z}) dF_{Y|\mathbf{z}}(y) + \zeta_{i2}(t, y, \mathbf{z}) \right\}. \quad (\text{A.14})$$

With a functional central limit theorem,  $\widetilde{W}_{\mathbf{z}}(t, v)$  converges to a zero-mean Gaussian process.

### c. Asymptotic Properties of $\widehat{\text{PPV}}_{\mathbf{z}}(t, v)$

For the convergence of  $\widehat{\text{PPV}}_{\mathbf{z}}(t, v)$ , we require the same conditions as specified in Dabrowska (1997). Briefly, the kernel function  $K(\cdot)$  is a symmetric probability density function with bounded support and continuous bounded second derivative. The bandwidth  $h$  is chosen such that  $nh^2 \rightarrow \infty$  and  $nh^4 \rightarrow 0$  as  $n \rightarrow \infty$ . It follows from Dabrowska (1997) that  $\sup_{t, y} \left| \widehat{\Lambda}_{y, \mathbf{z}}(t) - \Lambda_{y, \mathbf{z}}(t) \right| = o_p(n^{-1/4})$  and

$$n^{\frac{1}{2}} (\widehat{\boldsymbol{\beta}} - \boldsymbol{\beta}_0) \simeq n^{-\frac{1}{2}} \sum_{i=1}^n \mathcal{A}_i,$$

where

$$\mathcal{A}_i = \mathcal{I}(\boldsymbol{\beta}_0)^{-1} \int \left\{ \mathbf{Z}_i - \frac{\mathbb{R}_{Y_i}^{(1)}(u, \boldsymbol{\beta})}{\mathbb{R}_{Y_i}^{(0)}(u, \boldsymbol{\beta})} \right\} \{dN_i(u) - I(X_i \geq u) \exp(\boldsymbol{\beta}_0^\top \mathbf{Z}_i) \lambda_{0Y_i}(u) du\},$$

$\mathcal{I}(\boldsymbol{\beta})$  is the limit of  $\frac{\partial^2 C^*(\boldsymbol{\beta})}{\partial \boldsymbol{\beta} \partial \boldsymbol{\beta}^\top}$ , and  $\mathbb{R}_y^{(l)}(u, \boldsymbol{\beta})$  is the limit of  $n^{-1} \sum_{i=1}^n K_h(Y_i - y) I(X_i \geq s) \exp(\boldsymbol{\beta}^\top \mathbf{Z}_i) \mathbf{Z}_i^{\otimes l}$ .

The uniform convergence of  $\widehat{\Lambda}_{y, \mathbf{z}}(t)$ , together with the uniform consistency of  $\widehat{F}_{Y|\mathbf{z}}(y)$  and  $c_{\mathbf{z}(v)}$ , and Lemma A.3 of Biliias et al. (1997), implies the uniform consistency of  $\widehat{\text{PPV}}_{\mathbf{z}}(t, v)$ .

Now, to derive the large sample distribution for  $\widehat{\text{PPV}}_{\mathbf{z}}(t, v)$ , we write

$$\widehat{\mathcal{W}}_{\mathbf{z}}(t, v) = n^{\frac{1}{2}} \{ \widehat{\text{PPV}}_{\mathbf{z}}(t, v) - \text{PPV}_{\mathbf{z}}(t, v) \} = \{ \widehat{\mathcal{W}}_{\mathbf{z}1}(t, v) + \widehat{\mathcal{W}}_{\mathbf{z}2}(t, v) \} / (1 - v),$$

where

$$\begin{aligned} \widehat{\mathcal{W}}_{\mathbf{z}1}(t, v) &= n^{\frac{1}{2}} \int_{\widehat{c}_{\mathbf{z}}(v)}^{\infty} \left\{ e^{-\widehat{\Lambda}_{y,\mathbf{z}}(t)} - e^{-\Lambda_{y,\mathbf{z}}(t)} \right\} d\widehat{F}_{Y|z}(y), \\ \widehat{\mathcal{W}}_{\mathbf{z}2}(t, v) &= n^{\frac{1}{2}} \left\{ \int_{\widehat{c}_{\mathbf{z}}(v)}^{\infty} S_{y,\mathbf{z}}(t) d\widehat{F}_{Y|z}(y) - \int_{c_{\mathbf{z}}(v)}^{\infty} S_{y,\mathbf{z}}(t) dF_{Y|z}(y) \right\}. \end{aligned}$$

To approximate the distribution of  $\widehat{\mathcal{W}}_{\mathbf{z}1}(t, v)$ , we again invoke Lemma A.3 of Biliias et al.(1997) and use the fact that  $\sup_{t,y} |\widehat{\Lambda}_{y,\mathbf{z}}(t) - \Lambda_{y,\mathbf{z}}(t)| + \sup_y |\widehat{F}_{Y|z}(y) - F_{Y|z}(y)| + \sup_v |\widehat{c}_{\mathbf{z}}(v) - c_{\mathbf{z}}(v)| = o_p(n^{-1/4})$  to obtain

$$\widehat{\mathcal{W}}_{\mathbf{z}1}(t, v) = -n^{\frac{1}{2}} \int_{c_{\mathbf{z}}(v)}^{\infty} S_{y,\mathbf{z}}(t) \left\{ \widehat{\Lambda}_{y,\mathbf{z}}(t) - \Lambda_{y,\mathbf{z}}(t) \right\} dF_{Y|z}(y) + o_p(1).$$

Now, it follows from the asymptotic expansions for  $\widehat{\Lambda}_{y,\mathbf{z}}(t)$  given in Dabrowska (1997) that

$$\begin{aligned} \widehat{\Lambda}_{y,\mathbf{z}}(t) - \Lambda_{y,\mathbf{z}}(t) &= \int_0^t \left\{ \frac{d\widehat{N}_y(s)}{\widehat{\pi}_y(s, \widehat{\boldsymbol{\beta}})} e^{\widehat{\boldsymbol{\beta}}\mathbf{z}} - \frac{d\widehat{N}_y(s)}{\widehat{\pi}_y(s, \boldsymbol{\beta}_0)} e^{\boldsymbol{\beta}_0\mathbf{z}} + \frac{d\widehat{N}_y(s)}{\widehat{\pi}_y(s, \boldsymbol{\beta}_0)} e^{\boldsymbol{\beta}_0\mathbf{z}} - \frac{dA_y(s)}{\pi_y(s, \boldsymbol{\beta}_0)} e^{\boldsymbol{\beta}_0\mathbf{z}} \right\} \\ &= \mathcal{B}_{\mathbf{z}}(t, y)(\widehat{\boldsymbol{\beta}} - \boldsymbol{\beta}_0) + e^{\boldsymbol{\beta}_0\mathbf{z}} \int_0^t \left[ \frac{d\left\{ \widehat{N}_y(s) - A_y(s) \right\}}{\pi_y(s)} - \frac{\{\widehat{\pi}_y(s) - \pi_y(s)\} dA_y(s)}{\pi_y^2(s)} \right] + o_p(n^{-\frac{1}{2}}) \\ &\simeq n^{-1} \sum_{i=1}^n \{ \mathcal{B}_{\mathbf{z}}(t, y) \mathcal{A}_i + K_h(Y_i - y) M_{y,\mathbf{z}}(t, X_i, \Delta_i, \mathbf{Z}_i) \} + o_p(n^{-\frac{1}{2}}) \end{aligned}$$

where  $A_y(s) = E\{N_i(s) \mid Y_i = y\} dP(Y_i \leq y)/dy$  is the limit of  $\widehat{N}_y(s)$ ,  $\widehat{\pi}_y(u) = \widehat{\pi}_y(u, \boldsymbol{\beta}_0)$ ,  $\pi_y(u) = \pi_y(u, \boldsymbol{\beta}_0)$ ,  $\mathcal{B}_{\mathbf{z}}(t, y)$  is  $\frac{\partial}{\partial \boldsymbol{\beta}} \int_0^t \frac{e^{\boldsymbol{\beta}\mathbf{z}} dA_y(s)}{\pi_y(s, \boldsymbol{\beta})}$  evaluated at  $\boldsymbol{\beta} = \boldsymbol{\beta}_0$ , and

$$M_{y,\mathbf{z}}(t, X_i, \Delta_i, \mathbf{Z}_i) = e^{\boldsymbol{\beta}_0\mathbf{z}} \int_0^t \left\{ \frac{dN_i(s)}{\pi_y(s)} - \frac{I(X_i \geq s) e^{\boldsymbol{\beta}_0\mathbf{Z}_i} dA_y(s)}{\pi_y^2(s)} \right\}.$$

It follows that

$$\widehat{\mathcal{W}}_{\mathbf{z}1}(t, v) \simeq -n^{-\frac{1}{2}} \sum_{i=1}^n \int_{c_{\mathbf{z}}(v)}^{\infty} S_{y,\mathbf{z}}(t) [K_h(y - Y_i) M_{y,\mathbf{z}}(t; X_i, \Delta_i) + \mathcal{B}_{\mathbf{z}}(t, y) \mathcal{A}_i] F'_{Y|z}(y) dy$$

Now, by a change variable  $\psi = \frac{y - Y_i}{h}$  and assuming that  $nh^4 = o_p(1)$ ,

$$\begin{aligned}
& n^{-\frac{1}{2}} h^{-1} \sum_{i=1}^n \int_{c_{\mathbf{z}}(v)}^{\infty} K\left(\frac{y - Y_i}{h}\right) S_{y,\mathbf{z}}(t) F'_{Y|\mathbf{z}}(y) M_{y,\mathbf{z}}(t; X_i, \Delta_i, \mathbf{Z}_i) dy \\
&= n^{-\frac{1}{2}} \sum_{i=1}^n \int_{-\infty}^{\infty} I(Y_i + h\psi \geq c_{\mathbf{z}}(v)) K(\psi) S_{Y_i+h\psi,\mathbf{z}}(t) F'_{Y|\mathbf{z}}(Y_i + h\psi) M_{Y_i+h\psi,\mathbf{z}}(t; X_i, \Delta_i, \mathbf{Z}_i) d\psi \\
&= n^{-\frac{1}{2}} \sum_{i=1}^n \int_{-\infty}^{\infty} I(Y_i \geq c_{\mathbf{z}}(v)) K(\psi) S_{Y_i,\mathbf{z}}(t) F'_{Y|\mathbf{z}}(Y_i) M_{Y_i,\mathbf{z}}(t; X_i, \Delta_i, \mathbf{Z}_i) d\psi + o_p(1) \\
&= n^{-\frac{1}{2}} \sum_{i=1}^n I(Y_i \geq c_{\mathbf{z}}(v)) S_{Y_i,\mathbf{z}}(t) F'_{Y|\mathbf{z}}(Y_i) M_{Y_i,\mathbf{z}}(t; X_i, \Delta_i, \mathbf{Z}_i) + o_p(1)
\end{aligned}$$

Therefore,  $\widehat{\mathcal{W}}_{\mathbf{z}1}(t, v) = -n^{-\frac{1}{2}} \sum_{i=1}^n \xi_{i1}(t, v, \mathbf{z}) + o_p(1)$ , where

$$\xi_{i1}(t, v, \mathbf{z}) = I(Y_i \geq c_{\mathbf{z}}(v)) S_{Y_i,\mathbf{z}}(t) F'_{Y|\mathbf{z}}(Y_i) M_{Y_i,\mathbf{z}}(t; X_i, \Delta_i, \mathbf{Z}_i) + \mathcal{A}_i \int_{c_{\mathbf{z}}(v)}^{\infty} S_{y,\mathbf{z}}(t) \mathcal{B}_{\mathbf{z}}(t, y) F'_{Y|\mathbf{z}}(y) dy.$$

On the other hand, the process  $\widehat{\mathcal{W}}_{\mathbf{z}2}(t, v)$  can be approximated by  $n^{-\frac{1}{2}} \sum_{i=1}^n \zeta_{i2}(t, v, \mathbf{z})$  as for  $\widetilde{\mathcal{W}}_{\mathbf{z}2}(t, v)$ . Hence,

$$\widehat{\mathcal{W}}_{\mathbf{z}1}(t, v) = n^{-\frac{1}{2}} \sum_{i=1}^n \xi_i(t, v, \mathbf{z}) + o_p(1)$$

where  $\xi_i(t, v, \mathbf{z}) = \xi_{i1}(t, v, \mathbf{z}) + \zeta_{i2}(t, v, \mathbf{z})$ . This, together with a functional central limit theorem, implies that  $\widehat{\mathcal{W}}_{\mathbf{z}}(t, v)$  converges weakly to a zero-mean Gaussian process.

## References

- Andersen, P.K. and Gill, R.D. (1982). cox's regression model for counting processes: A large sample study (Com: p1121-1124). *The Annals of Statistics* **10**, 1100-1120.
- Bilias, Y., Gu, M., and Ying, Z. (1997). Towards a general asymptotic theory for Cox model with staggered entry. *The Annals of Statistics* **25**, 662-682.
